# Supplementary material
Source: MDPI journal article supplement (https://www.mdpi.com/2311-553X/8/2/26)
Supplement: s1 [file s1]

Supplementary Information

# Patterns of differentially expressed circRNAs in human thymocytes

Pilar López-Nieva<sup>1,2,\*</sup>, Pablo Fernández-Navarro<sup>3,4,\*</sup>, María Ángeles Cobos-Fernández<sup>1,2</sup>, Iria González-Vasconcellos<sup>1,2</sup>, Raúl Sánchez Pérez<sup>5</sup>, Ángel Aroca<sup>5</sup>, José Fernández-Piqueras<sup>1,2</sup> and Javier Santos<sup>1,2</sup>

<sup>1</sup>Genome dynamics and function program, Genome decoding department, Severo Ochoa Molecular Biology Center (CBMSO), CSIC-Madrid Autonomous University, Madrid 28049, Spain.

<sup>2</sup>Institute of Health Research Jiménez Díaz Foundation, Madrid 28040, Spain.

<sup>3</sup>Cancer and Environmental Epidemiology Unit, National Center for Epidemiology, Institute of Health Carlos III, Madrid 28029, Spain.

<sup>4</sup>Consortium for Biomedical Research in Epidemiology and Public Health (CIBERESP), Madrid 28029, Spain.

<sup>5</sup>Department of Congenital Cardiac Surgery, Hospital Universitario La Paz, Madrid 28046, Spain.

Pilar López-Nieva, pilar.lopez@cbm.csic.es, <https://orcid.org/0000-0001-6369-2444>

Pablo Fernández-Navarro, pfernandezn@isciii.es, <https://orcid.org/0000-0001-9427-2581>

María Ángeles Cobos-Fernández, macobos@cbm.csic.es.

Iria González-Vasconcellos, iria.gonzalez@cbm.csic.es, <https://orcid.org/0000-0002-4688-5508>

Raúl Sánchez Pérez, raulcaravaca@hotmail.com

Ángel Aroca, aarocap@telefonica.net

José Fernández Piqueras, jfpiqueras@cbm.csic.es, <https://orcid.org/0000-0003-4520-6785>

Javier Santos, jsantos@cbm.csic.es, <https://orcid.org/0000-0002-4168-6251>

PLN and PFN contributed equally to this work

\* Correspondence: pilar.lopez@cbm.csic.es; Tel.: +34 91 196 46 53

*Supplementary Figure and Tables*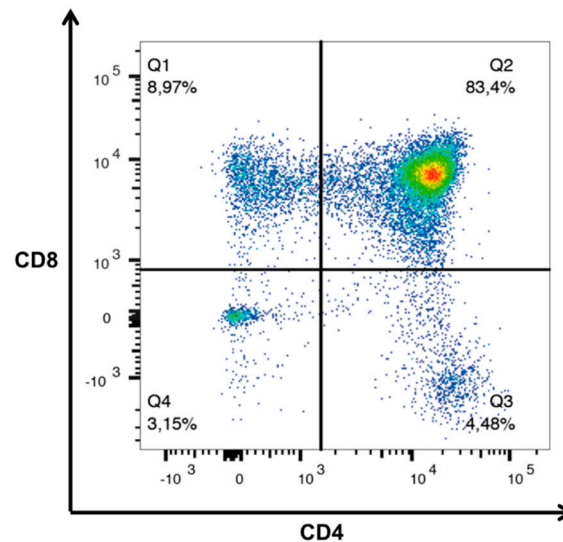

**Figure S2. Representative flow cytometry analysis expression of CD4 and CD8 in human postnatal thymocytes.** SP8: CD8+CD4<sup>-</sup> (Q1); DP: CD4+CD8<sup>+</sup> (Q2); SP4: CD4+CD8<sup>-</sup> (Q3). DN: CD4<sup>-</sup>CD8<sup>-</sup> (Q4). Quantitative data above the plots represent mean absolute values  $\pm$  SD of three independent experiments. Test were performed using GraphPad Prism version 9.3.1 for Mac OS X, (GraphPad Software, San Diego, California USA, [www.graphpad.com](http://www.graphpad.com))

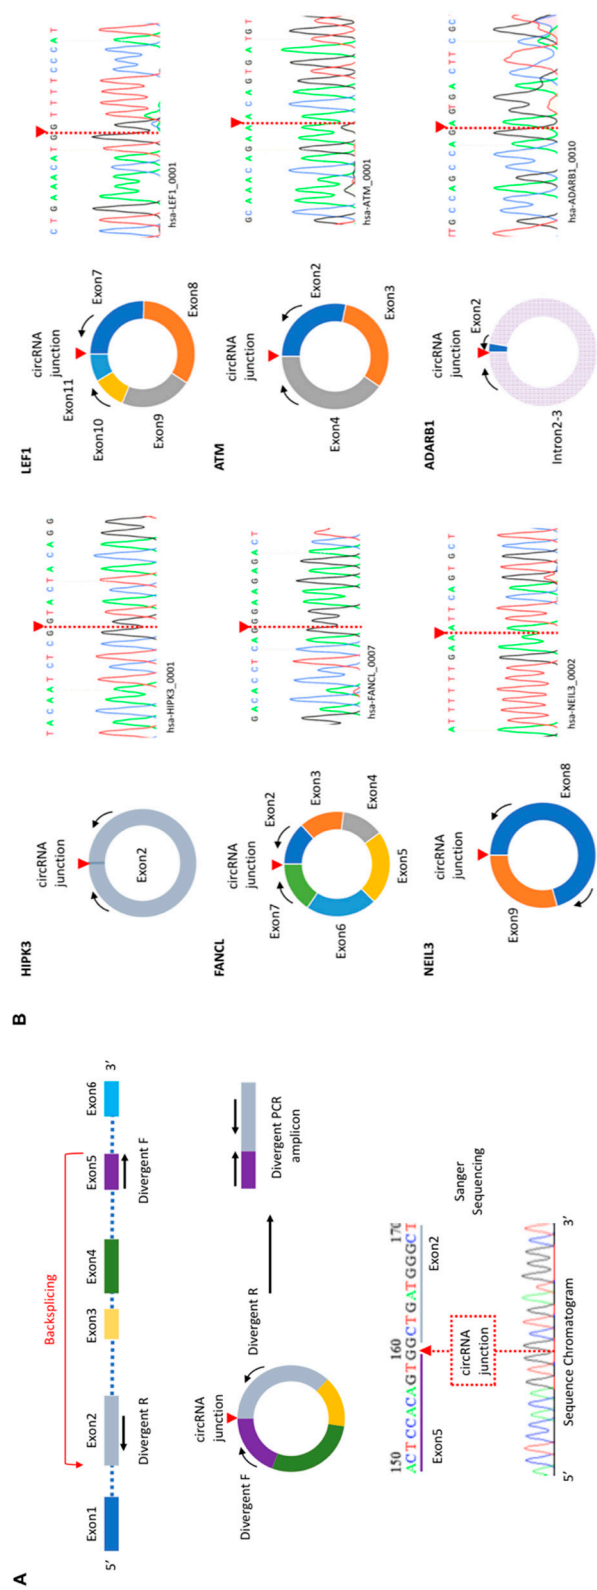

**Figure S1.- Validation of circRNAs by qRT-PCR and Sanger sequencing.** (A) Schematic illustration of circRNA biogenesis from backsplicing of pre-mRNA and schematic representation of the divergent primers used for detection and quantification of circRNAs. The red arrowhead represents the backsplice site. (B) Validation of circRNA expression using divergent primers. PCR products amplified with divergent primers resolved on Ethidium bromide-stained, 2% agarose gels. Sanger sequencing of purified PCR products showing the backsplice junction sequences of mentioned circRNAs. The red arrowhead represents the backsplice site.

**Table S1.** Patient characteristics table.

| HTC<br>(Human Thymus Code) | Age                | Sex    | Cytometric phenotyping<br>(identification of cell populations in flow cytometry) |               |                   | Cell Pool  | Comments                                                                                                                        |
|----------------------------|--------------------|--------|----------------------------------------------------------------------------------|---------------|-------------------|------------|---------------------------------------------------------------------------------------------------------------------------------|
|                            |                    |        | CD34+                                                                            | DP (CD4+CD8+) | SP (CD4+ or CD8+) |            |                                                                                                                                 |
| 21017                      | 1 week             | Male   | 0,34%                                                                            | 79%           | 19,55%            | DP/SP      | Non chromosomal abnormalities, oncologic processes or genetic conditions with a propensity to develop them                      |
| 241017                     | 14 weeks           | Male   | 0,23%                                                                            | 61,50%        | 35,50%            | SP         | Shone's complex. Non chromosomal abnormalities, oncologic processes or genetic conditions with a propensity to develop them     |
| 261017                     | 20 weeks           | Male   | 3,89%                                                                            | 85,10%        | 12,64%            | DP/CD34/SP | Tetralogy of Fallot. Non chromosomal abnormalities, oncologic processes or genetic conditions with a propensity to develop them |
| 81117                      | 4 years y 2 months | Female | 3,42%                                                                            | 83,40%        | 13,45%            | SP         | Non chromosomal abnormalities, oncologic processes or genetic conditions with a propensity to develop them                      |
| 131117                     | 4 weeks            | Male   | 3,32%                                                                            | 55,10%        | 34,50%            | CD34       | Non chromosomal abnormalities, oncologic processes or genetic conditions with a propensity to develop them                      |
| 201117                     | 2 weeks            | Male   | 3,29%                                                                            | 74,70%        | 22,92%            | CD34/SP    | Non chromosomal abnormalities, oncologic processes or genetic conditions with a propensity to develop them                      |
| 271117                     | 2 weeks            | Female | 0,69%                                                                            | 79,40%        | 19,74%            | DP/SP      | Non chromosomal abnormalities, oncologic processes or genetic conditions with a propensity to develop them                      |

**Table S1.** Patient characteristics table.**Table S2.** Pairwise comparisons between circRNAs of the three thymocyte populations. 50 circRNAs are differentially expressed in at least one pairwise comparison (ST2 vs ST1, ST3 vs ST1 and ST3 vs ST2).**Table S3.** Sequences of the DNA primers used to in this study.

| Convergent (conv) primers                                        |             |   |                         |           |
|------------------------------------------------------------------|-------------|---|-------------------------|-----------|
|                                                                  | Gene Symbol |   | (5'–3') sequences       | Size (bp) |
|                                                                  | ADARB1      | F | ACACCCTCATTTCATCCAGCG   | 124       |
|                                                                  |             | R | GGTTTCTTGACTGGCGGAGA    |           |
|                                                                  | ATM         | F | TGCGTGGCTAACGGAGAAAA    | 121       |
|                                                                  |             | R | ATCACTGTCACTGCACTCGG    |           |
|                                                                  | FANCL       | F | TGGACACCTCAGAGCTCCTT    | 141       |
|                                                                  |             | R | TGCACTCCGTGGAGGTTTTT    |           |
|                                                                  | HIPK3       | F | CAGTCTTCCTTCTCCGCTCC    | 166       |
|                                                                  |             | R | CTTCCTTCCCGGGGATTTGG    |           |
|                                                                  | IKZF1       | F | GTGAAGTCCACACTGGCGTA    | 182       |
|                                                                  |             | R | GGGAGGTACGTTGTGCTGAA    |           |
|                                                                  | LEF1        | F | CATGTCCAGGTTTTCCCATC    | 180       |
|                                                                  |             | R | TGAGGTCTTTTGGCTCCTG     |           |
|                                                                  | NEIL3       | F | TGTTTGGTCCTCTCTGTTTCA   | 122       |
|                                                                  |             | R | GCCAACAATGGAAAGATGGCA   |           |
|                                                                  |             |   |                         |           |
| Divergent (div) primers for circRNA detection and quantification |             |   |                         |           |
| CircRNA ID                                                       | Gene Symbol |   | (5'–3') sequences       | Size (bp) |
| hsa-ADARB1_0010                                                  | ADARB1      | F | TGAGCACACCCTCATTTCATC   | 142       |
|                                                                  |             | R | AGTTGCCCTTAAGCTCTCC     |           |
| hsa-ATM_0001                                                     | ATM         | F | AGGCAGAAAAAGATGCAGGA    | 133       |
|                                                                  |             | R | ACGGCAGCAGATAAGCAGAT    |           |
| hsa-FANCL_0007                                                   | FANCL       | F | TTTTCTGTTCCATTTTGTGC    | 124       |
|                                                                  |             | R | TGTTCTCAGCTGCCAACTACA   |           |
| hsa-HIPK3_0001                                                   | HIPK3       | F | GGGTCGGCCAGTCATGTATC    | 106       |
|                                                                  |             | R | ACTGCTTGGCTCTACTTTGAGT  |           |
| hsa-IKZF1_0001                                                   | IKZF1       | F | GATGAGCCCATGCCGATCC     | 180       |
|                                                                  |             | R | GGGACATGTCTTGACCCTCA    |           |
| hsa-LEF1_0001                                                    | LEF1        | F | CTTTATCCAGGCTGGTCTGC    | 229       |
|                                                                  |             | R | GTCAGTGTGGGGATGTTCTT    |           |
| hsa-NEIL3_0002                                                   | NEIL3       | F | CCGAAAACAGCCCAATACTC    | 121       |
|                                                                  |             | R | CGGGTACTTCATTAAGTGGCTAA |           |

**Table S3.** Sequences of the DNA primers used to in this study.

Table S4. Comparison between fold change data between the different populations (ST1.ST2/ST1-ST3/ST2-ST3) and qPCR data

| ANOVA (Tukey's Multiple Comparison Test Results) |         |            |         |         |                      |        |
|--------------------------------------------------|---------|------------|---------|---------|----------------------|--------|
|                                                  | Group   | Difference | Lower   | Upper   | p-value Adjusted     | log2FC |
| hsa-HIPK3_0001                                   | ST1-ST2 | -14,267    | -17,099 | -11,435 | <b>0*</b>            | -1,59  |
|                                                  | ST1-ST3 | -13,267    | -16,099 | -10,435 | <b>0*</b>            | -1,41  |
|                                                  | ST2-ST3 | 0,1        | -0,1832 | 0,3832  | 0,5573               | 0,15   |
| hsa-FANCL_0007                                   | ST1-ST2 | -15,167    | -19,247 | -11,087 | <b>0,0001*</b>       | -2,64  |
|                                                  | ST1-ST3 | -14,033    | -18,113 | -0,9953 | <b>0,0001*</b>       | -1,5   |
|                                                  | ST2-ST3 | 0,1133     | -0,2947 | 0,5213  | 0,6871               | 0,73   |
| hsa-NEIL3_0002                                   | ST1-ST2 | 22,933     | 19,686  | 2,618   | <b>0,0000015619*</b> | 1,41   |
|                                                  | ST1-ST3 | -0,33      | -0,6547 | -0,0053 | <b>0,047*</b>        | -1,74  |
|                                                  | ST2-ST3 | -26,233    | -2,948  | -22,986 | <b>0,0088381*</b>    | -3,18  |
| hsa-LEF1_0001                                    | ST1-ST2 | 20,167     | 18,742  | 21,591  | <b>0,00022628*</b>   | 3,54   |
|                                                  | ST1-ST3 | 0,78       | 0,6375  | 0,9225  | <b>0,000006564*</b>  | 1,9    |
|                                                  | ST2-ST3 | -12,367    | -13,791 | -10,942 | <b>0,0065563*</b>    | -1,37  |
| hsa-IKZF1_0001                                   | ST1-ST2 | 0,89       | 0,604   | 1,176   | <b>0,0002*</b>       | 1,61   |
|                                                  | ST1-ST3 | 1,67       | 1,384   | 1,956   | <b>0,0000044038*</b> | 2,47   |
|                                                  | ST2-ST3 | 0,78       | 0,494   | 1,066   | <b>0,0004</b>        | 0,83   |
| hsa-ATM_0001                                     | ST1-ST2 | 0,62       | 0,4495  | 0,7905  | <b>0,0001*</b>       | 2,24   |
|                                                  | ST1-ST3 | 2,79       | 26,195  | 29,605  | <b>0,000038172*</b>  | 3,6    |
|                                                  | ST2-ST3 | 2,17       | 19,995  | 23,405  | <b>0,00063075*</b>   | 0,98   |
| hsa-ADARB1_0010                                  | ST1-ST2 | -0,1667    | -0,4128 | 0,0795  | 0,175                | 1,51   |
|                                                  | ST1-ST3 | 0,7        | 0,4538  | 0,9462  | <b>0,0003*</b>       | 3,48   |
|                                                  | ST2-ST3 | 0,8667     | 0,6205  | 11,128  | <b>0,0001*</b>       | 1,39   |

Pairwise comparisons between circRNAs of the three thymocyte populations.

Table S4. Comparison between the fold change data between the different populations (ST1.ST2/ST1-ST3/ST2-ST3) and qPCR data.

Table S5. Differentially expressed mRNAs involved in T-cell differentiation.

**Table S6.- Overexpressed as well as inhibited mRNAs detected during differential expression analysis for the three comparisons.** The total mRNA detected was 16,032 (90.1%) in the whole set of samples. From the mRNA count data, differential expression analysis was performed using the Wald statistic and fold-change values were adjusted using the apeglm shrinkage estimator. In addition, an internal independent filter, parametric model fitting, normalization by ratio and including developmental stage (ST1/ST2/ST3) as a factor were applied. For the multiple comparisons problem, the p-value was adjusted using the BH procedure controlling the type I error rate, being  $p < 0.05$  with a  $|\log_2FC| \geq 1$  and its standard error (SE), gene name and type of regulation (up/no/down) are shown. In addition, this table collects Ensembl biotype functional annotation, description of genomic elements, information contained in NCBI and GO terms of biological processes, molecular functions and cellular components associated with these described mRNAs and metabolic pathway information (KEGG) and PharmGKB. Information contained in this document: FeatureID, unique Ensembl identifier code of the genomic element analyzed; Filtering, identification of the genomic elements that have passed or not the independent filtering; Regulation, identification of the significant up/down regulated genomic elements; baseMean, normalized mean of counts for all samples; log2FC, logarithm in base 2 of the FC; SE.log2FC, standard error of the logarithm in base 2 of the FC; p.value, unadjusted significance level; p.adjusted, significance level adjusted by BH (FDR 5%); labid], count of replicates; Gene.Symbol, Gene symbol; Chr, chromosome where the genomic element is located; Band, cytoband; Biotype, classification of the genomic element detected in its Ensembl biotype; Gene.Synonyms, other aliases of the gene symbol; Description, NCBI gene information of the detected genomic element; KEGG.Pathways, identifier of KEGG metabolic pathways associated to a genomic element; GO.ID, identifier of ontological terms associated to a genomic element.

**Table S7.- circRNA-miRNA-mRNA networks. Sheet “Results”:** Description of the circRNA-miRNA-gene networks constructed. This table shows the circRNA, miRNA and Genes included in the networks constructed and information about and information on the evaluation of the networks in relation to the possibility of including circRNA acting as miRNA sponge (see manuscript) and genes involved in T-cell differentiation in the thymus. Information contained in this table: circBaseID for circRNA; miRbase ID for miRNAs; Gene\_symbol; type of network=(2)Network including a circRNA very possibly acting as miRNA sponge, (1)Network including a circRNA possibly acting as miRNA sponge, (0)Network not including a circRNA acting as miRNA sponge; GO\_T\_cell\_diff (YES/NO)=gene included in the network involved in T-cell differentiation in the thymus attending to the description of GO-ONTOLOGY; ST2\_ST1, ST3\_ST1, ST3\_ST2= Checking variables of the criteria for the network classification shown in the variable “type” for each comparison (DOWN\*= log2 of fold change observed in both differential expression circRNA and mRNA analyzes were lower than or equal to -1 and FDR values were  $\leq 0.05$ , UP\*= log2 of fold change observed in both differential expression circRNA and mRNA analyzes were higher than or equal to 1 and FDR values were  $\leq 0.05$ , DOWN= log2 of fold change observed in both differential expression circRNA and mRNA analyzes were lower than or equal to -1 and FDR values were  $> 0.05$ , UP= log2 of fold change observed in both differential expression circRNA and mRNA analyzes were higher than or equal to 1 and FDR values were  $> 0.05$ , NO= in any other option); log2FC, logarithm in base 2 of the FC in each comparison for circRNAs expression and for mRNAs expression. **Sheet “circRNA”:** this table collects the annotation of the circRNAs included in the constructed circRNA-miRNA-mRNA networks and the results of the Pairwise comparisons in Differential Expression analysis between the three thymocyte populations for each circRNA. **Sheet “mRNA”:** this table collects for each gene included in the constructed circRNA-miRNA-mRNA networks, functional annotation, description of genomic elements, information contained in NCBI and GO terms of biological processes, molecular functions and cellular components associated with these described mRNAs and metabolic pathway information (KEGG) and PharmGKB and the results of the Pairwise comparisons in Differential Expression analysis between the three thymocyte populations for each mRNA.
